# Supplementary material
Source: PubMed Central journal article supplement (PMC10619627)
Supplement: NIHMS1933645-supplement-supplementary_info.pdf [file NIHMS1933645-supplement-supplementary_info.pdf]

# Multi-channel deep learning with intracranial neurostimulation can localize seizure onset zones in humans

\*Graham W. Johnson,<sup>1,7,8</sup> Leon Y. Cai,<sup>1,8</sup> Derek J. Doss,<sup>1,7,8</sup> Jasmine W. Jiang,<sup>7,8,9</sup> Aarushi S. Negi,<sup>9</sup> Saramati Narasimhan,<sup>1,7,8,9</sup> Danika L. Paulo,<sup>9</sup> Hernán F. J. González,<sup>1,7,8</sup> Shawniqua Williams Roberson,<sup>1,10</sup> Sarah K. Bick,<sup>9</sup> Catie E. Chang,<sup>2</sup> Victoria L. Morgan,<sup>1,7,8,9,10</sup> Mark T. Wallace,<sup>3,4,5,6</sup> Dario J. Englot<sup>1,2,7,8,9,10,11</sup>

Departments of <sup>1</sup>Biomedical Engineering, <sup>2</sup>Electrical and Computer Engineering, <sup>3</sup>Hearing & Speech Sciences, <sup>4</sup>Psychology, <sup>5</sup>Psychiatry and Behavioral Sciences, and <sup>6</sup>Pharmacology at Vanderbilt University; <sup>7</sup>Vanderbilt University Institute of Imaging Science at Vanderbilt University Medical Center; <sup>8</sup>Vanderbilt Institute for Surgery and Engineering, Vanderbilt University; Departments of <sup>9</sup>Neurological Surgery, <sup>10</sup>Neurology, <sup>11</sup>Radiology and Radiological Sciences at Vanderbilt University Medical Center

Corresponding author: Graham Johnson

[graham.w.johnson@vanderbilt.edu](mailto:graham.w.johnson@vanderbilt.edu)

Village at Vanderbilt  
1500 21st Avenue South, Suite 4333  
Nashville, Tennessee 37212

**Keywords:** temporal lobe epilepsy, seizure onset zone, single-pulse electrical stimulation, cortico-cortical evoked potentials, deep learning

**Number of text pages:**

**Number of words:** 1800

**Number of figures:** 1

**Number of tables:** 1

## 29 **Abstract**

30 In drug resistant temporal lobe epilepsy, automated tools for seizure onset zone (SOZ) localization using brief  
31 interictal recordings would supplement presurgical evaluations and improve care. Thus, we sought to localize  
32 SOZs by training a multi-channel convolutional neural network on stereo-EEG (SEEG) cortico-cortical evoked  
33 potentials. We performed single pulse electrical stimulation with 10 drug resistant temporal lobe epilepsy  
34 patients implanted with SEEG. Using the 500,000 unique post-stimulation SEEG epochs, we trained a multi-  
35 channel one-dimensional convolutional neural network to determine whether an SOZ was stimulated. SOZs  
36 were classified with a mean leave-one-patient-out testing sensitivity of 78.1% and specificity of 74.6%. To  
37 achieve maximum accuracy, the model requires a 0-350 ms post stimulation time period. Post-hoc analysis  
38 revealed that the model accurately classified unilateral vs bilateral mesial temporal lobe seizure onset, and  
39 neocortical SOZs. This is the first demonstration, to our knowledge, that a deep learning framework can be  
40 used to accurately classify SOZs using cortico-cortical evoked potentials. Our findings suggest accurate  
41 classification of SOZs relies on a complex temporal evolution of evoked potentials within 350 ms of stimulation.  
42 Validation in a larger dataset could provide a practical clinical tool for the presurgical evaluation of drug  
43 resistant epilepsy.

44

45

46

47

48

49

50

51

52

53

54

55

56

57

## 58 Introduction

59 Epilepsy affects over 50 million people worldwide, with temporal lobe epilepsy (TLE) being the most common  
60 focal epilepsy.<sup>1</sup> Approximately 30-40% of TLE patients continue to have debilitating seizures despite maximal  
61 therapy with anti-seizure medications.<sup>2</sup> Drug resistant patients may undergo presurgical evaluation ahead of  
62 resection, ablation, or neurostimulation therapies. A major goal of presurgical workup is to find the areas of the  
63 brain responsible for seizure generation, i.e. the seizure onset zones (SOZs). However, precise localization of  
64 SOZs can be challenging with non-invasive modalities such as scalp electroencephalography (EEG), MRI, and  
65 PET. Therefore, invasive intracranial monitoring with stereo-EEG (SEEG) is often pursued to provide direct  
66 electrographic recordings of seizures to localize SOZs. Monitoring after SEEG implantation often requires long  
67 hospital stays of days to weeks to record multiple ictal events.<sup>3</sup> Thus, it has been proposed that inter-ictal  
68 single-pulse electrical stimulation (SPES) of the SEEG contacts to elicit cortico-cortical evoked potentials  
69 (CCEP) can help localize SOZs more efficiently.<sup>4-6</sup>

70 A challenge of interpreting CCEPs using SEEG is that the foundational work in this field was done using  
71 subdural electrode grids that measured consistent electrographic phenomena after stimulation, e.g. N1 (10-50  
72 ms) and N2 (50-300 ms) responses.<sup>4</sup> However, N1 and N2 wave polarity and morphology are defined based  
73 on the consistent electrode orientation of subdural electrode grids relative to the cortical surface, and thus  
74 orthogonal to cortical pyramidal neurons. In contrast, SEEG has less consistent orientation relative to cortical  
75 structures, and translation of N1 and N2 terminology for subcortical gray matter is even more challenging due  
76 to heterogenous cytoarchitecture.<sup>7</sup> Thus, it is difficult to predict the pattern of CCEP wave morphology for any  
77 given SEEG contact. Accordingly, most groups rely on coarse metrics for CCEPs in SEEG such as root-mean-  
78 squared power.<sup>6,8</sup> However, these metrics may miss important electrographic features that could help  
79 characterize the epileptogenic network. We propose that a multi-channel one-dimensional convolutional neural  
80 network (CNN) is well-suited for recognizing variable evoked wave morphology from multiple SEEG contacts  
81 simultaneously. This could be a useful tool to delineate whether a given set of CCEPs resulted from an SOZ or  
82 non-SOZ being stimulated. Further, by probing various time windows post-stimulation, we can systematically  
83 determine which post-stimulation time periods contain the most important classifying features.

## 85 **Methods**

### 86 *Participants and single-pulse electrical stimulation*

87 We collected over 500,000 post-stimulation 900 ms SEEG epochs from 10 patients with drug resistant TLE  
88 who underwent presurgical evaluation (**Table 1**). Clinical data were collected through chart review, and seizure  
89 outcomes were assigned using the Engel scale.<sup>9</sup> This study received Institutional Review Board approval and  
90 informed subject consents were obtained. We conducted single pulse electrical stimulation (SPES) with every  
91 adjacent bipolar pair of contacts in gray matter for each patient. We used a 10 second, 1 Hz, 300 microsecond,  
92 biphasic pulse at 3.0 milliamps with a recording sampling rate of 512 Hz.

### 93 *Preprocessing and SOZ labeling*

94 We filtered raw SEEG data using Matlab's filtfilt function (MathWorks inc., Natick, MA, USA) with Butterworth  
95 filter passbands of 1-59, 61-119 and 121-150 Hz. We then parsed the data into 900 ms epochs following each  
96 1 Hz stimulation. This resulted in over 500,000 preprocessed epochs for training our model. SOZs were  
97 defined as regions containing any contacts involved in ictal onset of one or more seizures after epileptologist  
98 interpretation of all ictal data. Using custom SEEG planning software, CRAnial Vault Explorer (CRAVE), we  
99 automatically localized every contact for each patient and created a table of all inter-contact Euclidean  
100 distances.<sup>10</sup>

### 101 *Deep learning*

102 Using post-stimulation EEG epochs, we trained a one-dimensional multi-channel multi-scale CNN (**Fig. 1A**). To  
103 accomplish this, we modified the Multi-Scale-1D-ResNet developed by Fei Wang  
104 (<https://github.com/geekfeiw/Multi-Scale-1D-ResNet>) to input 40 SEEG channels simultaneously. To avoid  
105 stimulation artifact and implantation bias, the epochs were distance thresholded to exclude any SEEG  
106 channels within 20 mm of the stimulation pair.<sup>11</sup> For each training pass, we randomized the subset of 40  
107 channels chosen from a patient's entire available channels. We utilized a weighted binary cross entropy loss  
108 function and stopped training after five model epochs. We implemented a leave-one-patient-out testing  
109 strategy across all patients. We first tested the ability of the trained model to classify SOZs using the entire 0-  
110 900 ms window. Next, we tested the model with only a non-overlapping 50 ms sliding window over the post-

111 stimulation period. We also trained the model on three separate randomized region labels to serve as a  
112 control.

### 113 *Post-hoc testing:*

114 We conducted post-hoc testing to determine 1) which post-stimulation time period is best for SOZ  
115 classification, 2) can the model classify unilateral vs. bilateral mesial temporal onset, and 3) can the model  
116 accurately classify neocortical temporal SOZs? We accomplished (1) by nulling the data outside the desired  
117 time window before training. For (2), we calculated the accuracy of left and right mesial temporal SOZ  
118 classification for patients with bilateral mesial temporal seizures (n=4) vs. patients with a) unilateral mesial  
119 temporal seizures on ictal SEEG, b) a bilateral SEEG implant, and c) seizure-free surgical outcomes (n=3). To  
120 accomplish (3), we calculated the accuracy of neocortical temporal SOZ classification in all patients.

### 121 *Statistical methods*

122 We calculated the sensitivity and specificity for the leave-one-patient-out testing across all 10 patients for the  
123 various time window analyses. We also report the Youden index (sensitivity + specificity – 100) to summarize  
124 the usefulness of the model at a given time window; Youden index values above 50 are generally considered  
125 to be a very useful model for classification, and values close to 0 are considered useless even if sensitivity or  
126 specificity is individually high.<sup>12</sup> We compared Youden indexes with paired t-tests using Bonferroni-Holm  
127 multiple comparison correction.

## 128 **Data availability**

129 Data and computer code are available upon reasonable request.

130

131

132

133

## 134 Results

### 135 *CNN trained on long-range CCEPs accurately classifies SOZs*

136 As outlined in **Fig. 1B**, the CNN trained on the entire 900 ms post-stimulation period correctly classified the  
137 stimulation pair as SOZ with a mean leave-one-patient-out testing sensitivity of 78.1% (95% confidence interval  
138 [CI] 67.8 to 88.4%) and specificity of 74.6% (95%CI 68.7 to 80.5%), resulting in an average Youden index of  
139 52.7 (95%CI 43.7 to 61.8). In comparison, when the model was trained using regions randomly labeled as SOZ  
140 or non-SOZ, the average Youden index was significantly decreased to 16.5 (95%CI 9.62 to 23.4, t-test  
141  $p=4.88e-6$ ). Furthermore, the model achieved significantly improved Youden indexes when training on 50 ms  
142 sliding windows ranging from 0-350 ms compared to the same windows with random labels (**Fig. 1C**).  
143 Interestingly, the specificity and sensitivity of the model peaked during different periods in the initial 350 ms  
144 post-stimulation – the sensitivity peaked for the time window that spans 100 to 150 ms, while the specificity  
145 peaked for the 0-50 ms time window. This suggests that delayed responses are most *sensitive* for classifying  
146 SOZs, whereas early responses are most *specific* for classifying SOZs.

### 147 *Important features are temporally distributed within the initial post-stimulation window*

148 We performed post-hoc analyses to assess which early post-stimulation window was most effective at  
149 classifying if an SOZ was stimulated (**Fig. 1D**). Using a time window of 0-350 ms we observed a leave-one-  
150 patient-out average testing sensitivity of 74.0% (95%CI 63.3 to 84.7%) and specificity of 78.5% (95%CI 75.9 to  
151 81.1%) with an average Youden index of 52.5 (95%CI 42.1 to 62.9) – very similar to when the model was  
152 trained on the entire 0-900 ms. When we divided the 0-350 ms period into 0-175 ms and 175-350 ms, the  
153 leave-one-patient-out testing Youden index dropped significantly, suggesting both early and late portions of  
154 this time window contribute to model performance.

### 155 *The model can classify unilateral vs. bilateral onset mesial temporal lobe epilepsy, and can detect neocortical* 156 *temporal SOZs*

157 We observed that the bilateral onset patients had left mesial temporal structures correctly classified as SOZs  
158 for 68.9% (95% CI 58.7 to 79.1%) of the CCEP epochs, and right mesial temporal structure epochs classified  
159 as SOZs for 67.9% (95%CI 45.4 to 90.4%) (**Fig. 1E**). For unilateral patients, the model correctly classified

mesial temporal structures ipsilateral to the seizure onset hemisphere as SOZs for 91.5% (95%CI 89.7 to 93.3%) of the epochs with a low false positive rate of 35.1% (95%CI 16.7 to 53.5%) for non-SOZs on the contralateral side. This sub analysis provides evidence that the model was not simply classifying all mesial temporal structures as SOZs, but rather provides accurate classification for unilateral vs. bilateral mesial temporal onset patients. Furthermore, the model correctly classified neocortical temporal SOZs at a rate of 64.4% (95%CI 44.3 to 84.5%), and misclassified neocortical temporal non-SOZs at only 26.0% (95%CI 19.7 to 32.3%) (Fig. 1F).

## Discussion

We have demonstrated that a CNN trained entirely on SEEG-derived CCEPs farther than 20 mm from the site of stimulation can classify an SOZ with high sensitivity and specificity in TLE. A strength of this approach is that the model accurately classified SOZs despite the variable morphology of CCEPs during stimulation of SEEG electrodes. Further, the most important post-stimulation features for classification are contained within 0-350 ms. This is not surprising considering that most previous findings using RMS have centered around N1 and N2 responses within 300 ms.<sup>4,13,14</sup> However, separating this window into smaller segments significantly reduces model accuracy. This suggests that there is a complex pattern of CCEPs occurring at various periods post-stimulation that must be considered in an ensemble to accurately classify the stimulation of ictogenic tissue – this observation could be due to varied phenotypes of evoked responses.<sup>15</sup> Additionally, through our sub analyses, we conclude that this model was not classifying all mesial temporal structures as SOZs and can accurately distinguish unilateral vs bilateral mesial temporal onset. Finally, the model can also accurately classify neocortical temporal SOZs.

### *Limitations and future work*

Although 500,000 non-overlapping SEEG epochs were used to train the CNN, training and testing datasets were divided at the patient level. Thus, our relatively small sample size of 10 patients limits our assessment of generalizability and motivated our conservative strategy of leave-one-patient-out testing across the entire cohort. Also, mean follow-up was 15.4 months, and future seizure recurrences may decrease the confidence in clinical SOZ localization and change labels for the CNN. We also did not include any focal extratemporal-lobe

186 epilepsy patients and thus cannot comment on the extension of these techniques to that population. Our future  
187 work is aimed at addressing these limitations by collaborating with other institutions that collect these rare  
188 datasets. We also hope to test this model on patients with surgical outcomes of Engel 2-4. Perhaps, previously  
189 unidentified SOZs, including bilateral seizure onset, could be elucidated in Engel 2-4 patients with a model  
190 trained on Engel 1 patients.

### 191 *Conclusions*

192 This work serves as the first demonstration, to our knowledge, that a one-dimensional multi-channel multi-  
193 scale CNN can learn highly non-linear features of SEEG-derived CCEPs occurring across multiple SEEG  
194 channels simultaneously to classify when an SOZ is stimulated. Furthermore, we demonstrated the importance  
195 of utilizing the entire 0-350 ms time window for classification. We hope that future work will consider using  
196 deep learning as a tool to explore the complex CCEPs generated with SEEG.

197

198

199

200

201

202

203

204

205

206

207

208

209

210

211

212



213

## 214 **Acknowledgements**

215 We would like to thank the patients participating in our investigation.

216

## 217 **Author contributions**

218 G.W.J. contributed to project conception, data collection, data preprocessing, data analysis, and manuscript  
219 preparation. L.Y.C. contributed to data analysis and manuscript preparation. D.J.D. contributed to data  
220 analysis, and manuscript preparation. J.W.J. contributed to data collection, data preprocessing, data analysis  
221 and manuscript preparation. A.S.N. contributed to data preprocessing, data analysis, and manuscript  
222 preparation. S.N., D.P., H.F.J.G., S.W.R., S.K.B., C.E.C., V.L.M., M.T.W. contributed to data analysis and  
223 manuscript preparation. D.J.E. contributed to project conception, data analysis, and manuscript preparation.

224

## 225 **Competing interests**

226 The authors disclose no conflicts of interest

227

## 228 **Funding**

229 This work was supported by the following funding sources: NINDS R01-NS112252-02, NINDS R01-NS075270,  
230 NINDS R01-NS110130, NINDS R01-NS108445, NINDS F31-NS106735, NINDS F31-NS120401-01, and NIH  
231 Training Grants: NIGMS T32-GM007347, NIBIB T32-EB021937, and NIBIB T32EB001628.

232

## 233 **Ethics Statement**

234 We confirm that we have read the journal's position on issues involved in ethical publication and affirm that this  
235 report is consistent with those guidelines.

236

## 237 References

- 238 1. Behr, C., et al., *Epidemiology of epilepsy*. *Revue Neurologique*, 2016. **172**(1): p. 27-36.
- 239 2. Engel, J., Jr., *What can we do for people with drug-resistant epilepsy? The 2016 Wartenberg Lecture*.  
240 *Neurology*, 2016. **87**(23): p. 2483-2489.
- 241 3. Englot, D.J., *A modern epilepsy surgery treatment algorithm: Incorporating traditional and emerging*  
242 *technologies*. *Epilepsy & Behavior*, 2018. **80**: p. 68-74.
- 243 4. Matsumoto, R., T. Kunieda, and D. Nair, *Single pulse electrical stimulation to probe functional and*  
244 *pathological connectivity in epilepsy*. *Seizure*, 2017. **44**: p. 27-36.
- 245 5. Van 'T Klooster, M.A., et al., *Time–frequency analysis of single pulse electrical stimulation to assist*  
246 *delineation of epileptogenic cortex*. *Brain*, 2011. **134**(10): p. 2855-2866.
- 247 6. Guo, Z.-h., et al., *Epileptogenic network of focal epilepsies mapped with cortico-cortical evoked*  
248 *potentials*. *Clinical Neurophysiology*, 2020(131): p. 2657-2666.
- 249 7. Buzsáki, G., C.A. Anastassiou, and C. Koch, *The origin of extracellular fields and currents — EEG,*  
250 *ECoG, LFP and spikes*. *Nature Reviews Neuroscience*, 2012. **13**(6): p. 407-420.
- 251 8. Prime, D., et al., *Considerations in performing and analyzing the responses of cortico-cortical evoked*  
252 *potentials in stereo-EEG*. *Epilepsia*, 2018. **59**(1): p. 16-26.
- 253 9. Engel, J., *Update on surgical treatment of the epilepsies: Summary of The Second International Palm*  
254 *Desert Conference on the Surgical Treatment of the Epilepsies (1992)*. 1993. **43**(8): p. 1612-1612.
- 255 10. D'Haese, P.-F., et al., *CranialVault and its CRAVE tools: A clinical computer assistance system for*  
256 *deep brain stimulation (DBS) therapy*. 2012. **16**(3): p. 744-753.
- 257 11. Prime, D., et al., *Quantifying volume conducted potential using stimulation artefact in cortico-cortical*  
258 *evoked potentials*. *J Neurosci Methods*, 2020. **337**: p. 108639.
- 259 12. Youden, W.J., *Index for rating diagnostic tests*. *Cancer*, 1950.
- 260 13. Mouthaan, B.E., et al., *Single Pulse Electrical Stimulation to identify epileptogenic cortex: Clinical*  
261 *information obtained from early evoked responses*. 2016. **127**(2): p. 1088-1098.
- 262 14. Zhang, N., et al., *The effectiveness of cortico-cortical evoked potential in detecting seizure onset zones*.  
263 *Neurological research*, 2018. **40**(6): p. 480-490.
- 264 15. Crocker, B., et al., *Local and distant responses to single pulse electrical stimulation reflect different*  
265 *forms of connectivity*. *Neuroimage*, 2021. **237**: p. 118094.
- 266
- 267
- 268
- 269
- 270
- 271

## 272 **Figure Legends**

273 **Figure 1: Deep learning on distant SEEG CCEPs can accurately classify SOZs. A)** We conducted single-  
274 pulse electrical stimulation on all gray matter bipolar pairs of contacts for 10 patients undergoing SEEG – this  
275 resulted in over 500,000 post-stimulation epochs from the recording channels. To avoid stimulation artifact and  
276 biases relating to contact implantation density due to clinical hypotheses, we excluded recordings from  
277 contacts that were within 20 mm of the stimulation site. We then trained a convolutional neural network (CNN)  
278 to classify if a clinically defined seizure onset zone (SOZ) or non-seizure onset zone (non-SOZ) was  
279 stimulated. **B)** We first trained the model using the entire 0-900 ms post-stimulation window. This resulted in a  
280 sensitivity of 78.1% and specificity of 74.6% with a significantly improved Youden index compared to training  
281 the model on random labels. **C)** For 50 ms sliding windows, the model performed better than random labels for  
282 the 0-350 ms post-stimulation 50 ms intervals. Paired t-tests with Bonferroni-Holm multiple comparison  
283 correction were conducted between the Youden index (blue), and the random-label Youden index (gray). Note:  
284 values on the x-axis represent ending time of the 50 ms window. **D)** Using only the 0-350 ms window resulted  
285 in a model accuracy comparable to using the 0-900 ms window. However, dividing this window into 0-175 ms  
286 or 175-350 ms resulted in a significant reduction in Youden indexes. **E)** The model was not simply classifying  
287 all mesial temporal structures as SOZs. For bilateral patients, the model classified left and right mesial  
288 temporal structures as SOZs with comparable confidence around 70%. For unilateral patients, the model  
289 correctly classified ipsilateral mesial temporal structures as SOZs at a rate of 91.5% and contralateral (i.e. non-  
290 SOZs) at a low rate of 35.1% - suggesting that the model can accurately classify unilateral vs. bilateral seizure  
291 onset. **F)** The model was also able to correctly classify neocortical temporal SOZs 64.4% of the time with a low  
292 false positive rate of 26.0%. White dot in violin plots is median, horizontal bar is mean.

# Data acquisition and neural network training

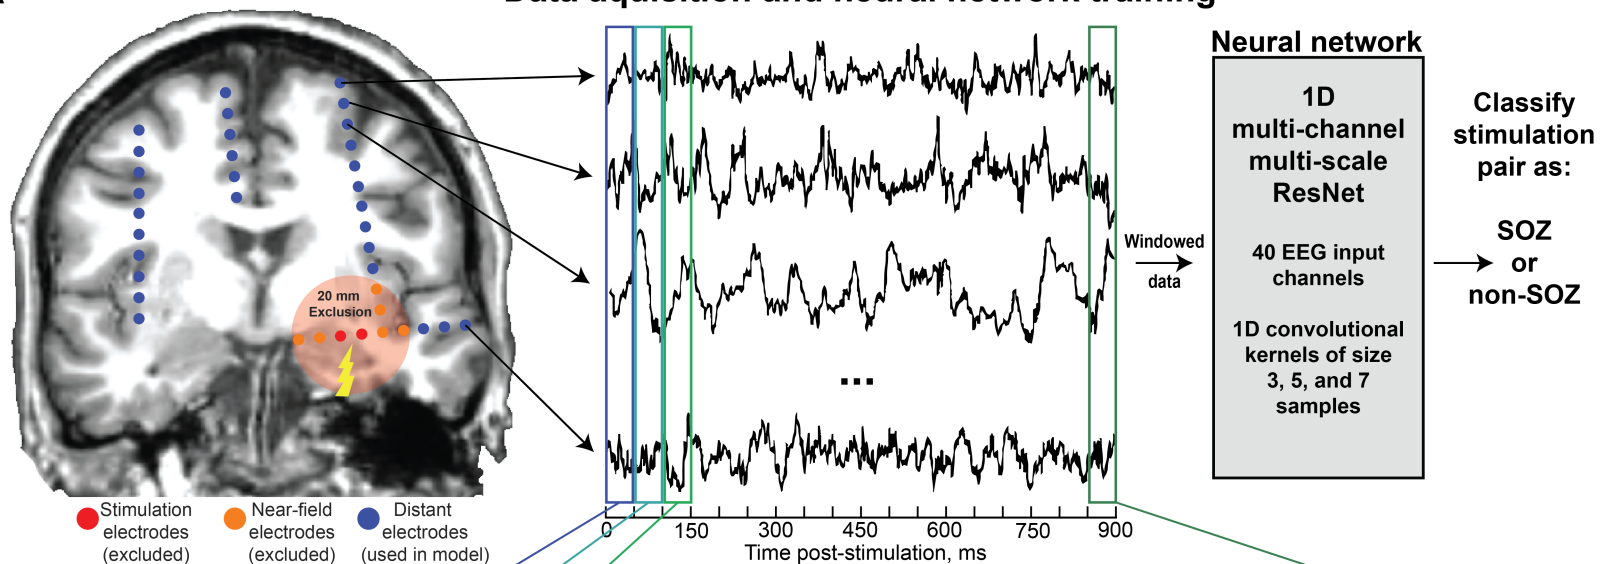

## B 0 - 900 ms window

Average leave-one-out testing

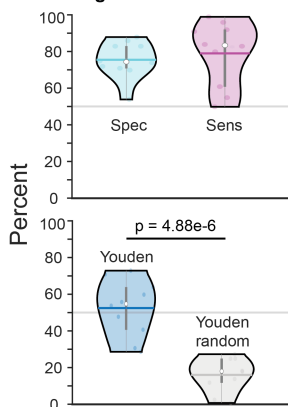

## C

### 50 ms sliding window

Average leave-one-out testing

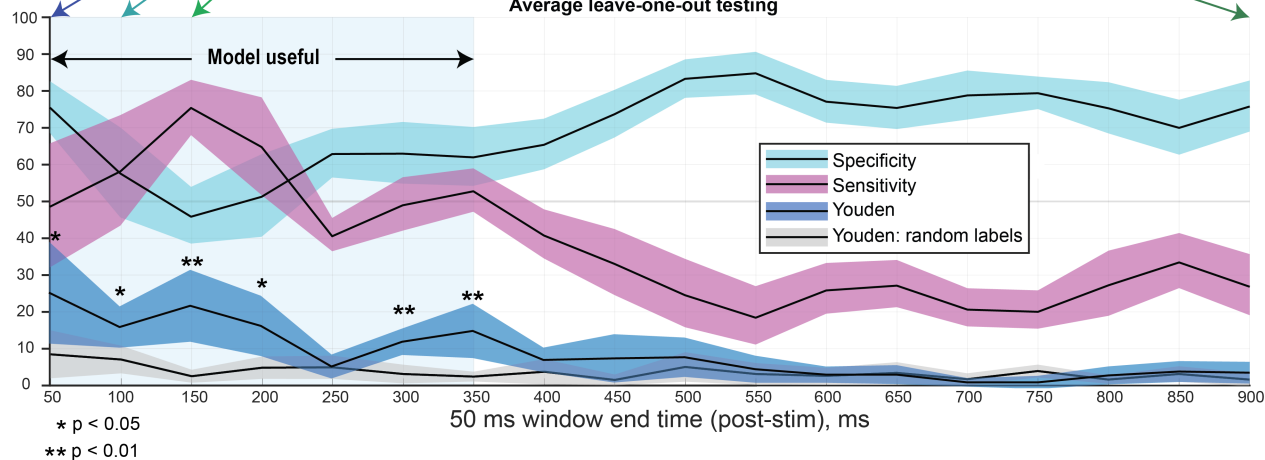

## D Early time window sub analysis

Average leave-one-out testing

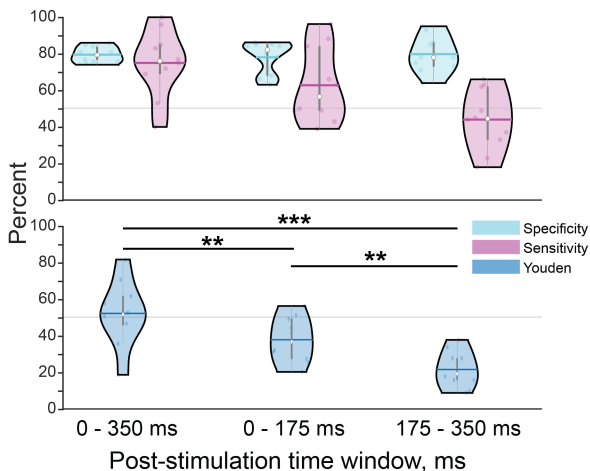

## E Mesial temporal lateralization

Average leave-one-out testing 0-900 ms

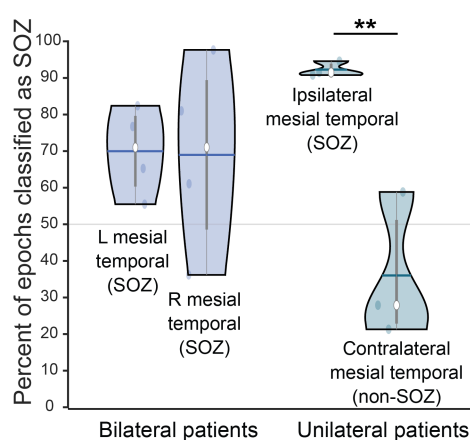

## F Neocortical temporal localization

Average leave-one-out testing 0-900 ms

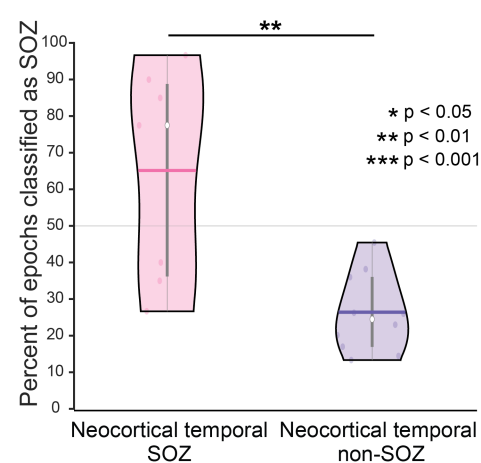

**Table 1: Patient demographics**

| Subject ID | Age | Sex | Racial identity | Epilepsy duration, years | Preoperative seizure frequency, per month | FBTC | MRI Findings             | Number of contact pairs stimulated | Surgery | Surgical outcome | Postsurgical duration, months |
|------------|-----|-----|-----------------|--------------------------|-------------------------------------------|------|--------------------------|------------------------------------|---------|------------------|-------------------------------|
| Pat1       | 51  | F   | White           | 20                       | 3.5                                       | No   | Normal                   | 69                                 | B/L RNS | >50 % reduction  | 25                            |
| Pat2       | 39  | F   | White           | 15                       | 60.5                                      | Yes  | Normal                   | 69                                 | B/L RNS | <50 % reduction  | 21                            |
| Pat3       | 30  | F   | Two or more     | 14                       | 9.5                                       | Yes  | Normal                   | 42                                 | R SAH   | Engel 1d         | 21                            |
| Pat4       | 58  | F   | Black           | 8                        | 1.0                                       | Yes  | Normal                   | 45                                 | R SAH   | Engel 1a         | 13                            |
| Pat5       | 24  | F   | Asian           | 7                        | 10.0                                      | No   | Normal                   | 72                                 | B/L RNS | <50 % reduction  | 12                            |
| Pat6       | 41  | M   | White           | 18                       | 1.0                                       | No   | L MTS                    | 71                                 | L SAH   | Engel 1a*        | 10                            |
| Pat7       | 28  | M   | Black           | 14                       | 1.0                                       | Yes  | L temporal encephalocele | 63                                 | L ATL   | Engel 1a*        | 10                            |
| Pat8       | 23  | F   | White           | 14                       | 32.0                                      | Yes  | Normal                   | 48                                 | B/L RNS | >50 % reduction  | 13                            |
| Pat9       | 23  | F   | White           | 7                        | 12.0                                      | No   | Normal                   | 53                                 | R ATL   | Engel 1a         | 15                            |
| Pat10      | 23  | M   | White           | 18                       | 1.0                                       | Yes  | Normal                   | 65                                 | R ATL   | Engel 1a         | 14                            |

R right; L left; B/L bilateral; FBTC focal to bilateral tonic-clonic seizures; RNS responsive neurostimulation; SAH selective amygdalohippocampectomy; ATL anterior temporal lobectomy; MTS mesial temporal sclerosis; <50% reduction refers to reduction in monthly seizure frequency compared to preoperative baseline. \*Outcome consistent with Engel 1a if persists >1yr.
